# Supplementary material for: Nitrogen-rich porous carbon derived from biomass as a high performance anode material for lithium ion batteries
Source: Royal Society of Chemistry journal article supplement (doi:10.1039/c4ta06614f), 2015-01-01
Supplement: c4ta06614f1.pdf [file c4ta06614f1.pdf]

# Nitrogen-rich porous carbon derived from biomass as a high performance anode material for lithium ion batteries

Junke Ou,<sup>a</sup> Yongzhi Zhang,<sup>b</sup> Li Chen,<sup>c</sup> Qian Zhao,<sup>a</sup> Yan Meng,<sup>a</sup> Yong Guo<sup>\*c</sup> and Dan Xiao<sup>\*a,b,c</sup>

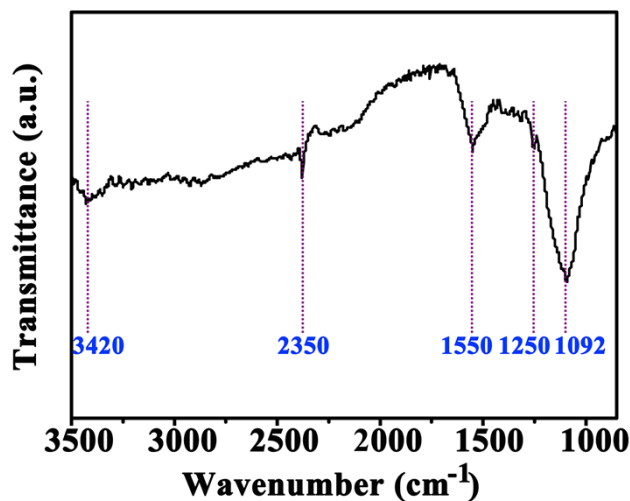

Fig. S1 FTIR spectra of as-fabricated OHC.

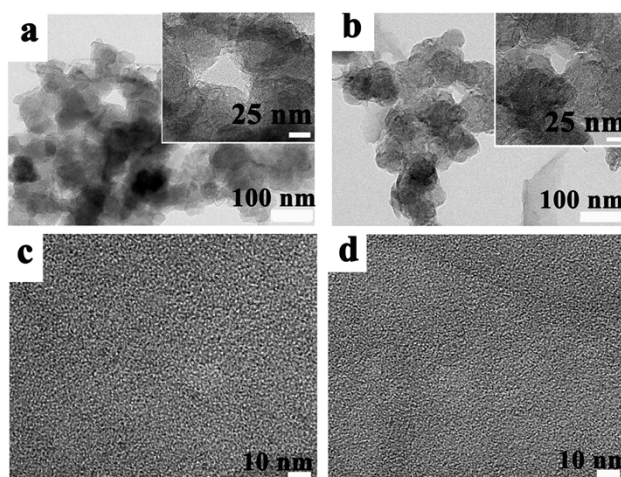

Fig. S2 TEM images of the electrode of the OHC before (a, c) and after (b, d) 20 cycles at a current density of 0.1 A g<sup>-1</sup> in the range 0.01-3 V. The insets of (a) and (b) are the partial enlargements of the relevant images.

**Table S1.** Elemental analysis of NOHC and OHC.

| Sample | Chemical composition [wt%] |     |     |     |
|--------|----------------------------|-----|-----|-----|
|        | C                          | N   | O   | H   |
| NOHC   | 83.7                       | 6.7 | 5.3 | 4.3 |
| OHC    | 85.0                       | 5.4 | 6.1 | 3.5 |

**Table S2.** Comparison of the performances of lithium ion batteries used OHC and those of some other typically carbon materials derived from biomass as anodes.

| Sample                                                                           | Carbon sources      | Initial reversible capacity<br>(mA h g <sup>-1</sup> ) | Rate capability<br>(mA h g <sup>-1</sup> ) | Ref.      |
|----------------------------------------------------------------------------------|---------------------|--------------------------------------------------------|--------------------------------------------|-----------|
| OHC                                                                              | Ox horn             | 1290 at 0.1 A g <sup>-1</sup>                          | 304 at 5 A g <sup>-1</sup>                 | This work |
| Rice husk-derived carbon                                                         | Rice husk           | 393 at 0.075 A g <sup>-1</sup>                         | 137 at 3.75 A g <sup>-1</sup>              | [S1]      |
| Heteroatom-enriched amorphous carbon with hierarchical porous structure(HAC-HPS) | Cotton cellulose    | 935 at 0.05 A g <sup>-1</sup>                          | 240 at 2 A g <sup>-1</sup>                 | [S2]      |
| Hierarchical porous carbons                                                      | Rice straws         | 986 at 0.1 C                                           | 257 at 2 C                                 | [S3]      |
| Protein derived mesoporous carbon (PMC)                                          | Egg white           | 1780 at 0.1 A g <sup>-1</sup>                          | 205 at 4 A g <sup>-1</sup>                 | [S4]      |
| Microstructure of mangrove-charcoaldersived carbon (MC)                          | Mangrove charcoal   | 524 at 0.003 A g <sup>-1</sup>                         | 440 at 0.3 A g <sup>-1</sup>               | [S5]      |
| New carbonaceous material                                                        | Spongy pomelo peels | 450 at 0.04 A g <sup>-1</sup>                          | 293 at 0.32 A g <sup>-1</sup>              | [S6]      |
| Disordered carbons                                                               | Cherry stones       | 600 at 0.1 C                                           | 200 at 5 C                                 | [S7]      |
| Porous carbon spheres                                                            | Porous starch       | 614                                                    | -                                          | [S8]      |
| Pyrolytic carbon                                                                 | Sorona              | 615 at 0.1 C                                           | -                                          | [S9]      |
| Pyrolyzed Sugar carbons (PSCs)                                                   | Local sugar         | 476 at 0.1 C                                           | -                                          | [S10]     |
| High capacity disordered carbons                                                 | Coconut shells      | 600                                                    | -                                          | [S11]     |
| Microporous carbon                                                               | Pinecone hull       | 321 at 0.01 A g <sup>-1</sup>                          | -                                          | [S12]     |
| Disordered carbonaceous materials                                                | Coffee shells       | 456 at 0.2 C                                           | -                                          | [S13]     |

|                                   |                   |                                |   |       |
|-----------------------------------|-------------------|--------------------------------|---|-------|
| High-capacity disordered carbons  | Peanut shells     | 1650 at 0.1 C                  | - | [S14] |
| Disordered carbonaceous materials | Banana fibers     | 401 at 0.1 C                   | - | [S15] |
| Carbonaceous materials            | Sugarcane bagasse | 310 at 0.105 A g <sup>-1</sup> | - | [S16] |

## References

- [S1] L. P. Wang, Z. Schnepf and M. M. Titirici, *J. Mater. Chem. A*, 2013, **1**, 5269.
- [S2] Y. S. Yun and H. J. Jin, *Mater. Lett.*, 2013, **108**, 311.
- [S3] F. Zhang, K. X. Wang, G. D. Li and J. S. Chen, *Electrochem. Commun.*, 2009, **11**, 130.
- [S4] Z. Li, Z. W. Xu, X. H. Tan, H. L. Wang, C. M. B. Holt, T. Stephenson, B. C. Olsen and D. Mitlin, *Energy Environ. Sci.*, 2013, **6**, 871.
- [S5] T. Liu, R. Y. Luo, W. M. Qiao, S. H. Yoon and I. Mochida, *Electrochim. Acta*, 2010, **55**, 1696.
- [S6] X. L. Sun, X. H. Wang, N. Feng, L. Qiao, X. W. Li and D. Y. He, *J. Anal. Appl. Pyrol.*, 2013, **100**, 181.
- [S7] J. C. Arrebola, A. Caballero, L. Hernán, J. Morales, M. Olivares-Marín and V. Gómez-Serrano, *J. Electrochem. Soc.*, 2010, **157**, A791.
- [S8] H. Q. Wang, Q. F. Dai, Q. Y. Li, J. H. Yang, X. X. Zhong, Y. G. Huang, A. Zhang and Z. X. Yan, *Solid State Ionics*, 2009, **180**, 1429.
- [S9] M. Christy, M. R. Jisha, A. R. Kim, K. S. Nahm, D. J. Yoo and E. K. Suh, *Indian J. Eng. Mater. S.*, 2010, **17**, 343.
- [S10] G. T. K. Fey and Y. C. Kao, *Mater. Chem. Phys.*, 2002, **73**, 37.
- [S11] Y. J. Hwang, S. K. Jeong, J. S. Shin, K. S. Nahm and A. M. Stephan, *J. Alloy. Compd.*, 2008, **448**, 141.
- [S12] Y. Zhang, F. Zhang, G. D. Li and J. S. Chen, *Mater. Lett.*, 2007, **61**, 5209.
- [S13] Y. J. Hwang, S. K. Jeong, K. S. Nahm, J. S. Shin and A. M. Stephan, *J. Phys. Chem. Solids*, 2007, **68**, 182.
- [S14] G. T. K. Fey, D. C. Lee, Y. Y. Lin and T. P. Kumar, *Synthetic Met.*, 2003, **139**, 71.
- [S15] A. M. Stephan, T. P. Kumar, R. Ramesh, S. Thomas, S. K. Jeong and K. S. Nahm, *Mater. Sci. Eng. A*, 2006, **430**, 132.
- [S16] Y. Matsubara, S. M. Lala and J. M. Rosolen, *J. Braz. Chem. Soc.*, 2010, **21**, 1877.
